# Supplementary material
Source: PubMed Central journal article supplement (PMC4879424)

Supporting Information for

## **Novel heteroaryl selenocyanates and diselenides as potent antileishmanial agents**

Ylenia Baquedano<sup>a,b,1</sup>, Verónica Alcolea<sup>a,b,1</sup>, Miguel Ángel Toro<sup>c</sup>, Killian Jesús Gutiérrez<sup>c</sup>, Paul Nguewa<sup>b</sup>, María Font<sup>a,b</sup>, Esther Moreno<sup>a,b</sup>, Socorro Espuelas<sup>b</sup>, Antonio Jiménez-Ruiz<sup>c</sup>, Juan Antonio Palop<sup>a,b</sup>, Daniel Plano<sup>a,b</sup>, Carmen Sanmartín<sup>a,b,\*</sup>

<sup>a</sup>*Departamento de Química Orgánica y Farmacéutica, <sup>b</sup>Instituto de Salud Tropical, University of Navarra (ISTUN), Irunlarrea, 1. E-31008 Pamplona, Spain*

<sup>c</sup>*Departamento de Bioquímica y Biología Molecular, Universidad de Alcalá, Carretera Madrid-Barcelona km 33,600. E-28871, Alcalá de Henares, Madrid, Spain*

<sup>1</sup>These authors have contributed equally to this manuscript.

\* Prof. Carmen Sanmartín

Department of Organic and Pharmaceutical Chemistry

University of Navarra

Irunlarrea, 1, E-31008 Pamplona

SPAIN

+34 948 425 600 (Telephone)

+34 948 425 649 (Fax)

e-mail: [sanmartin@unav.es](mailto:sanmartin@unav.es)

# $^1\text{H}$ NMR and $^{13}\text{C}$ NMR spectra for final compounds 1h, 2d and 2e.

3,5-Dimethyl-4-isoxazolyl selenocyanate (1h) –  $^1\text{H}$  NMR

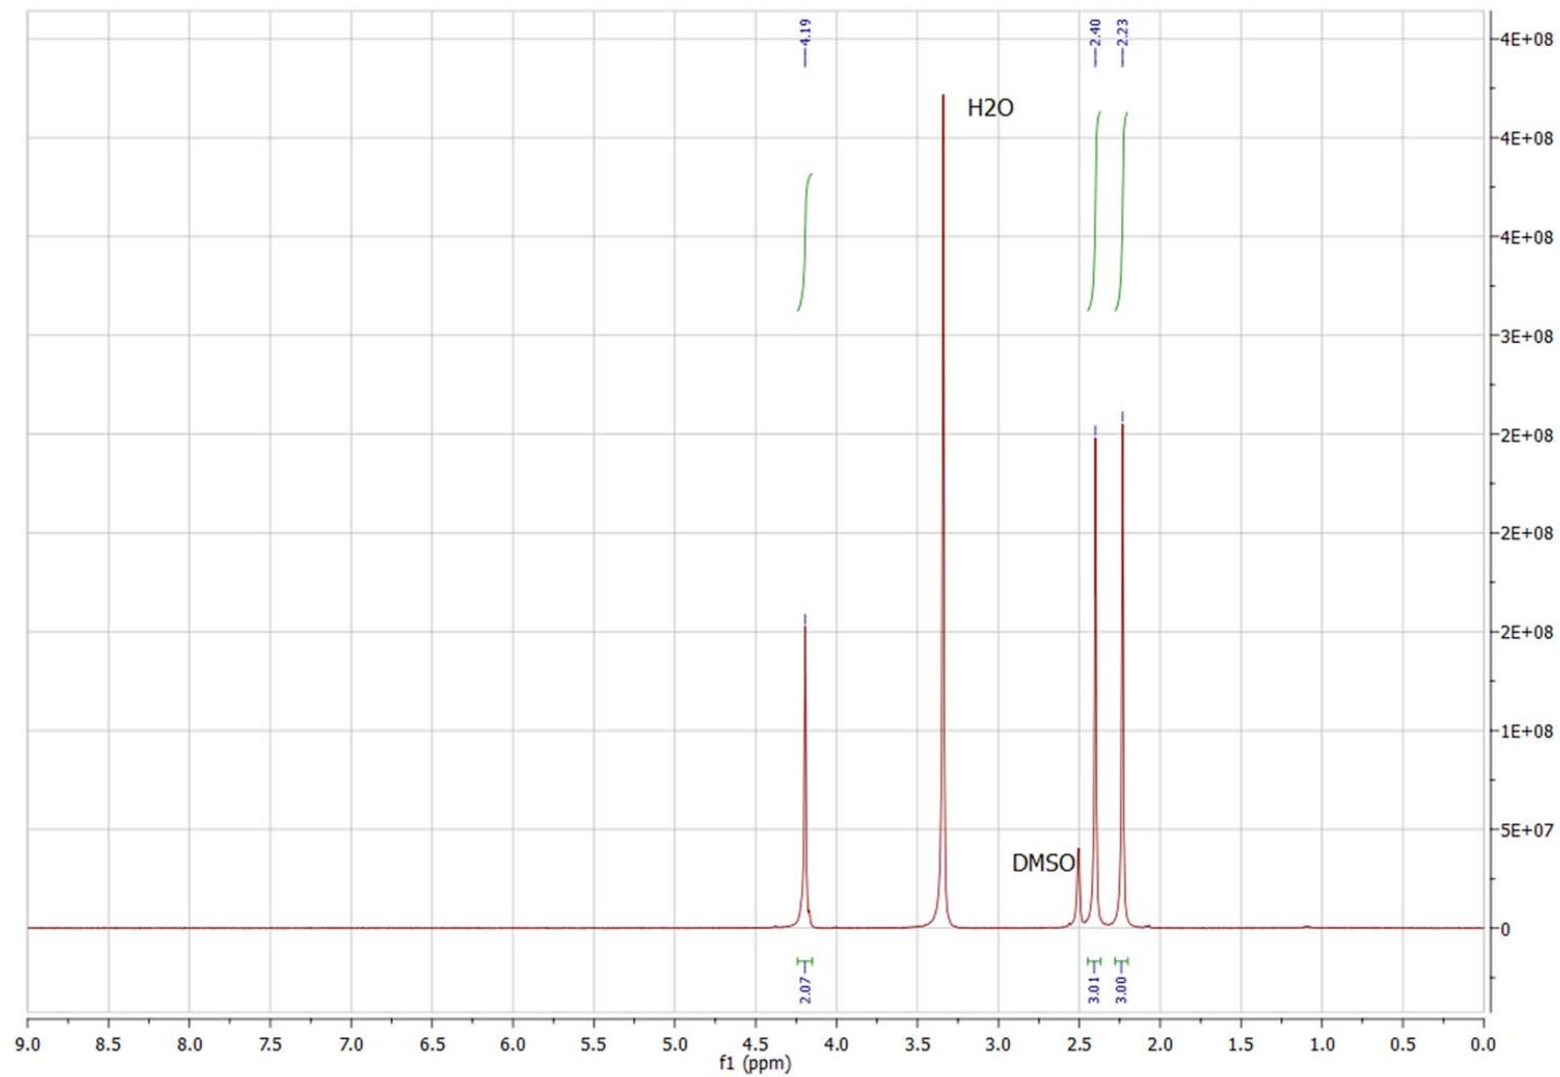

3,5-Dimethyl-4-isoxazolyl selenocyanate (**1h**) –  $^{13}\text{C}$  NMR

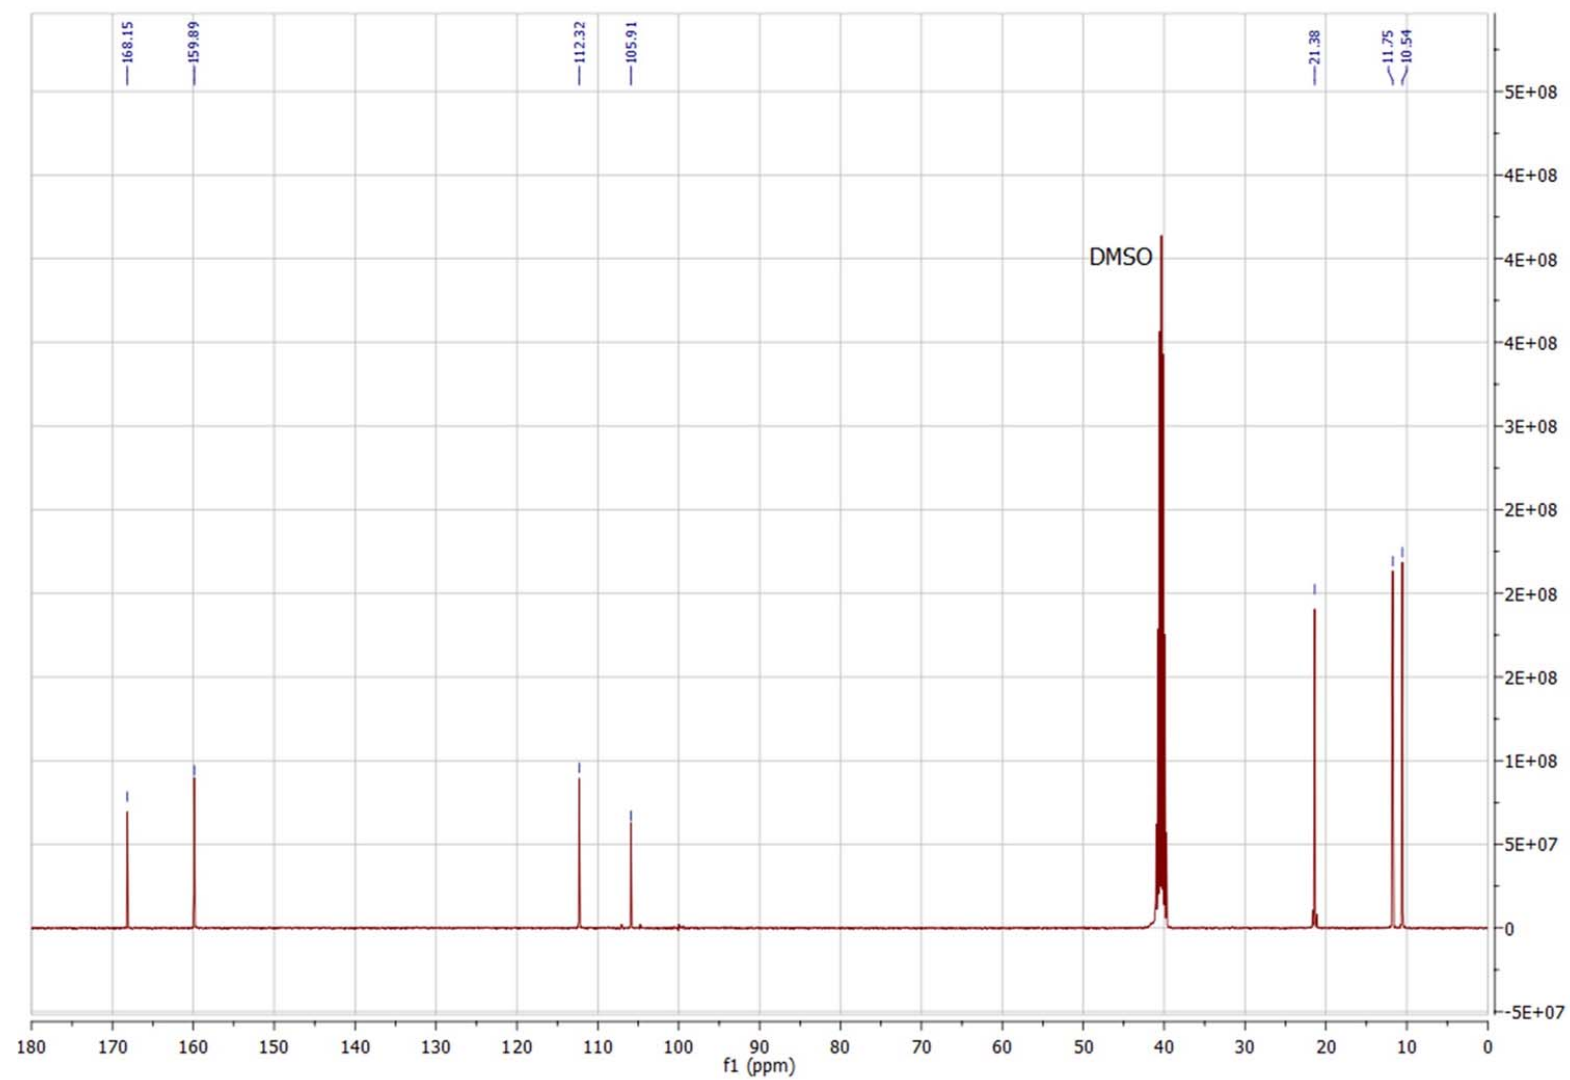

3,3'-(Diselenodiyldimethanediyl)bis(2-bromothiophene) (**2d**) –  $^1\text{H}$  NMR

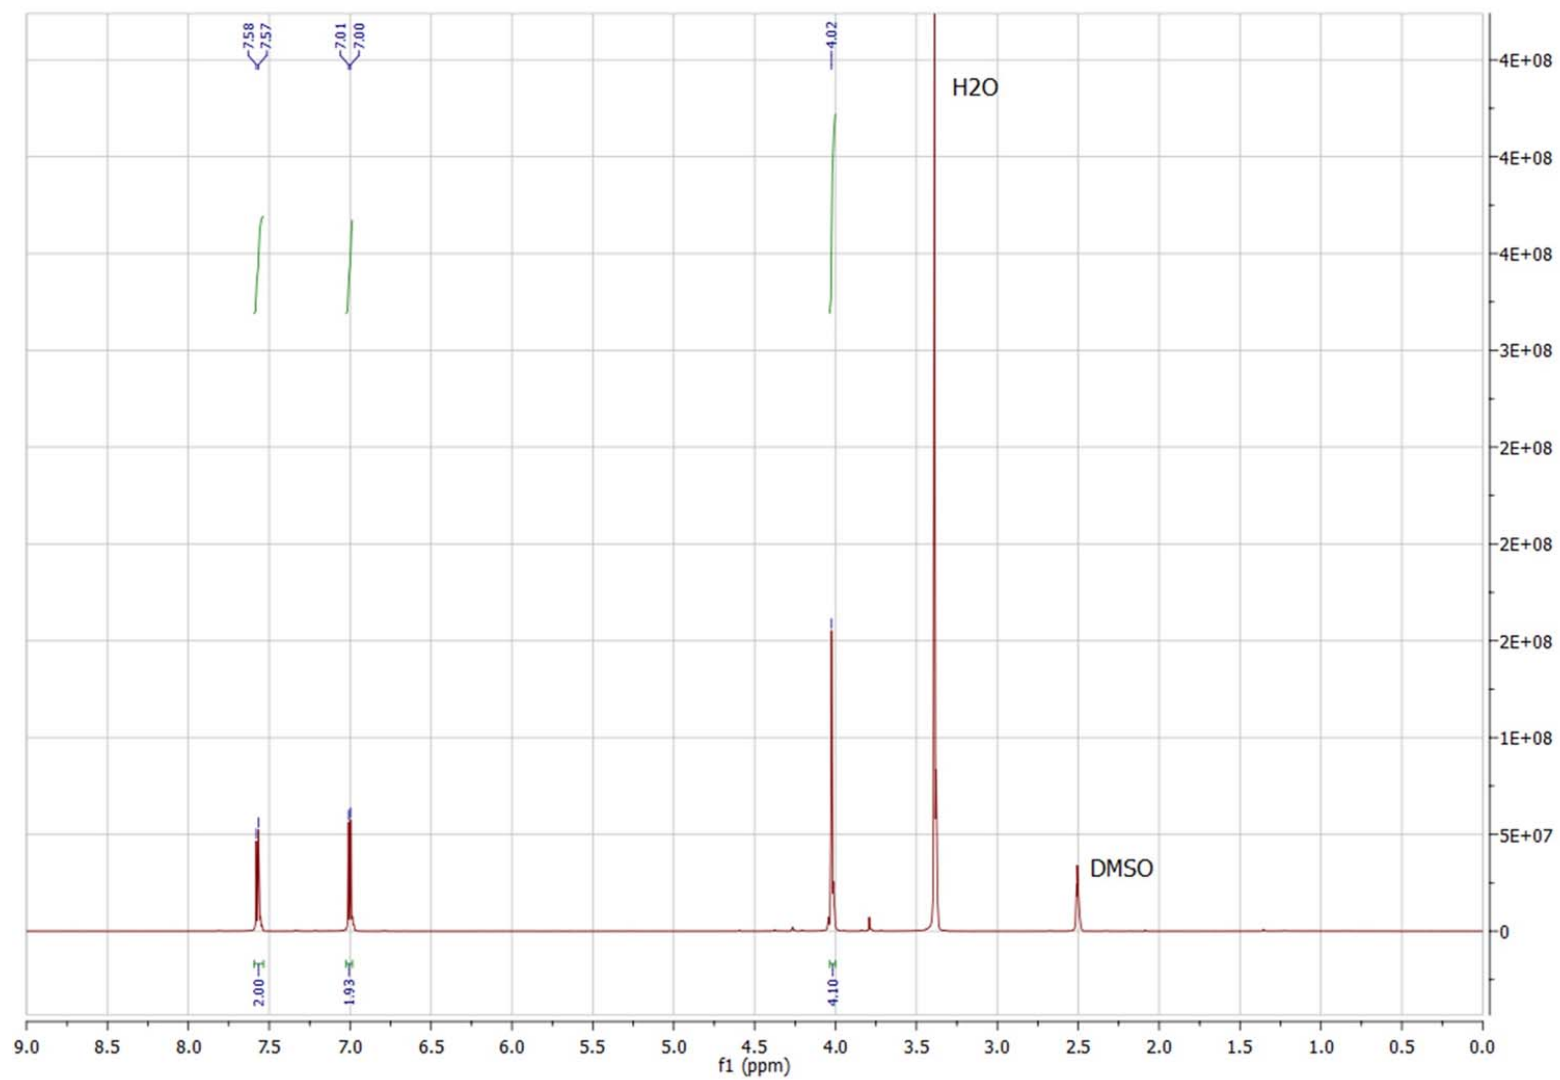

3,3'-(Diselenodiyldimethanediyl)bis(2-bromothiophene) (**2d**) –  $^{13}\text{C}$  NMR

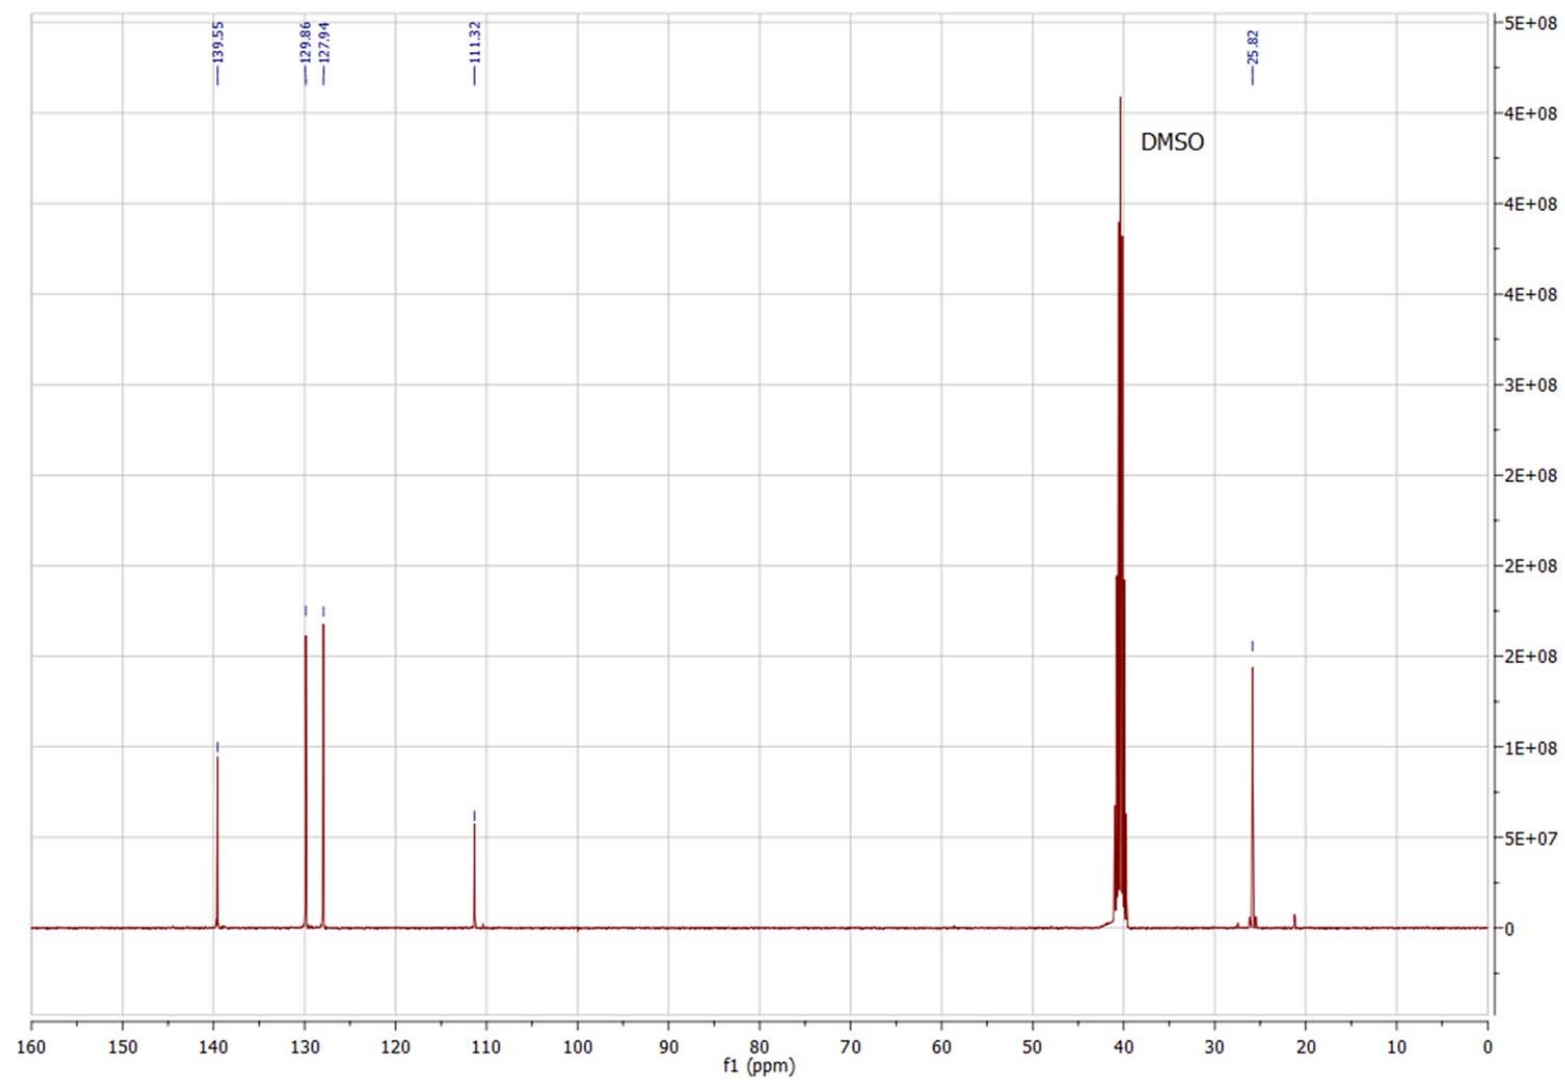

1,1'-(Diselenodiyldimethanediyl)bis(1*H*-benzotriazole) (**2e**) – <sup>1</sup>H NMR

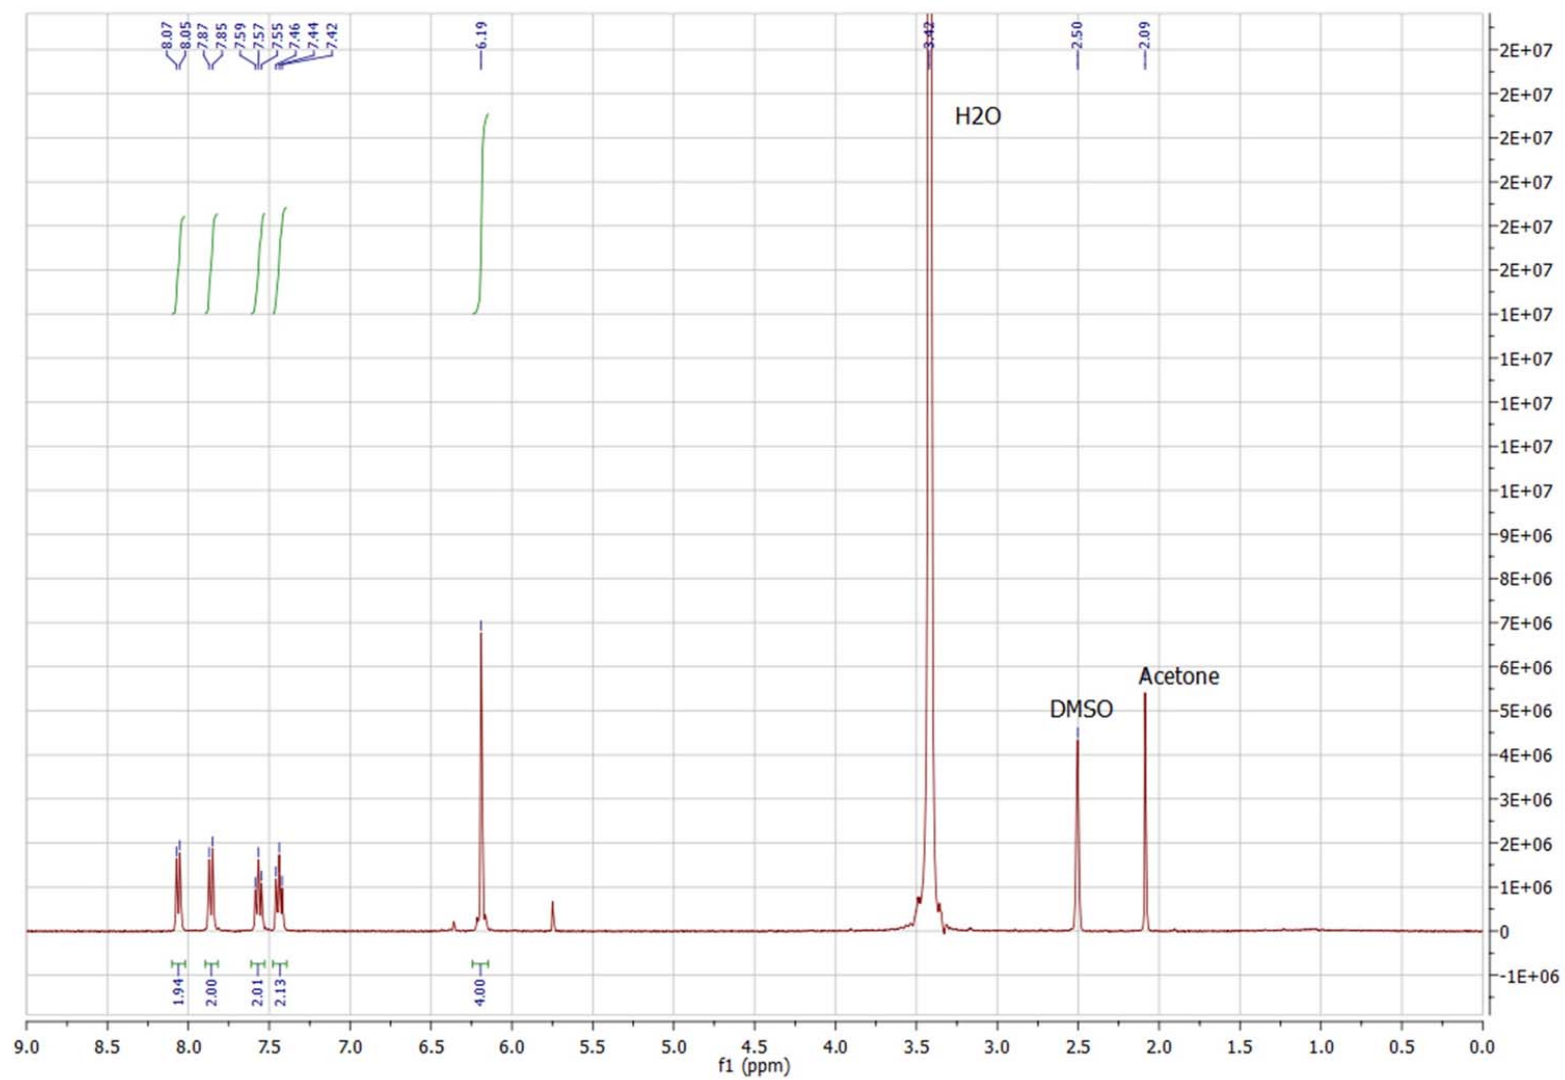

1,1'-(Diselenodiyldimethanediyl)bis(1*H*-benzotriazole) (**2e**) – <sup>13</sup>C NMR

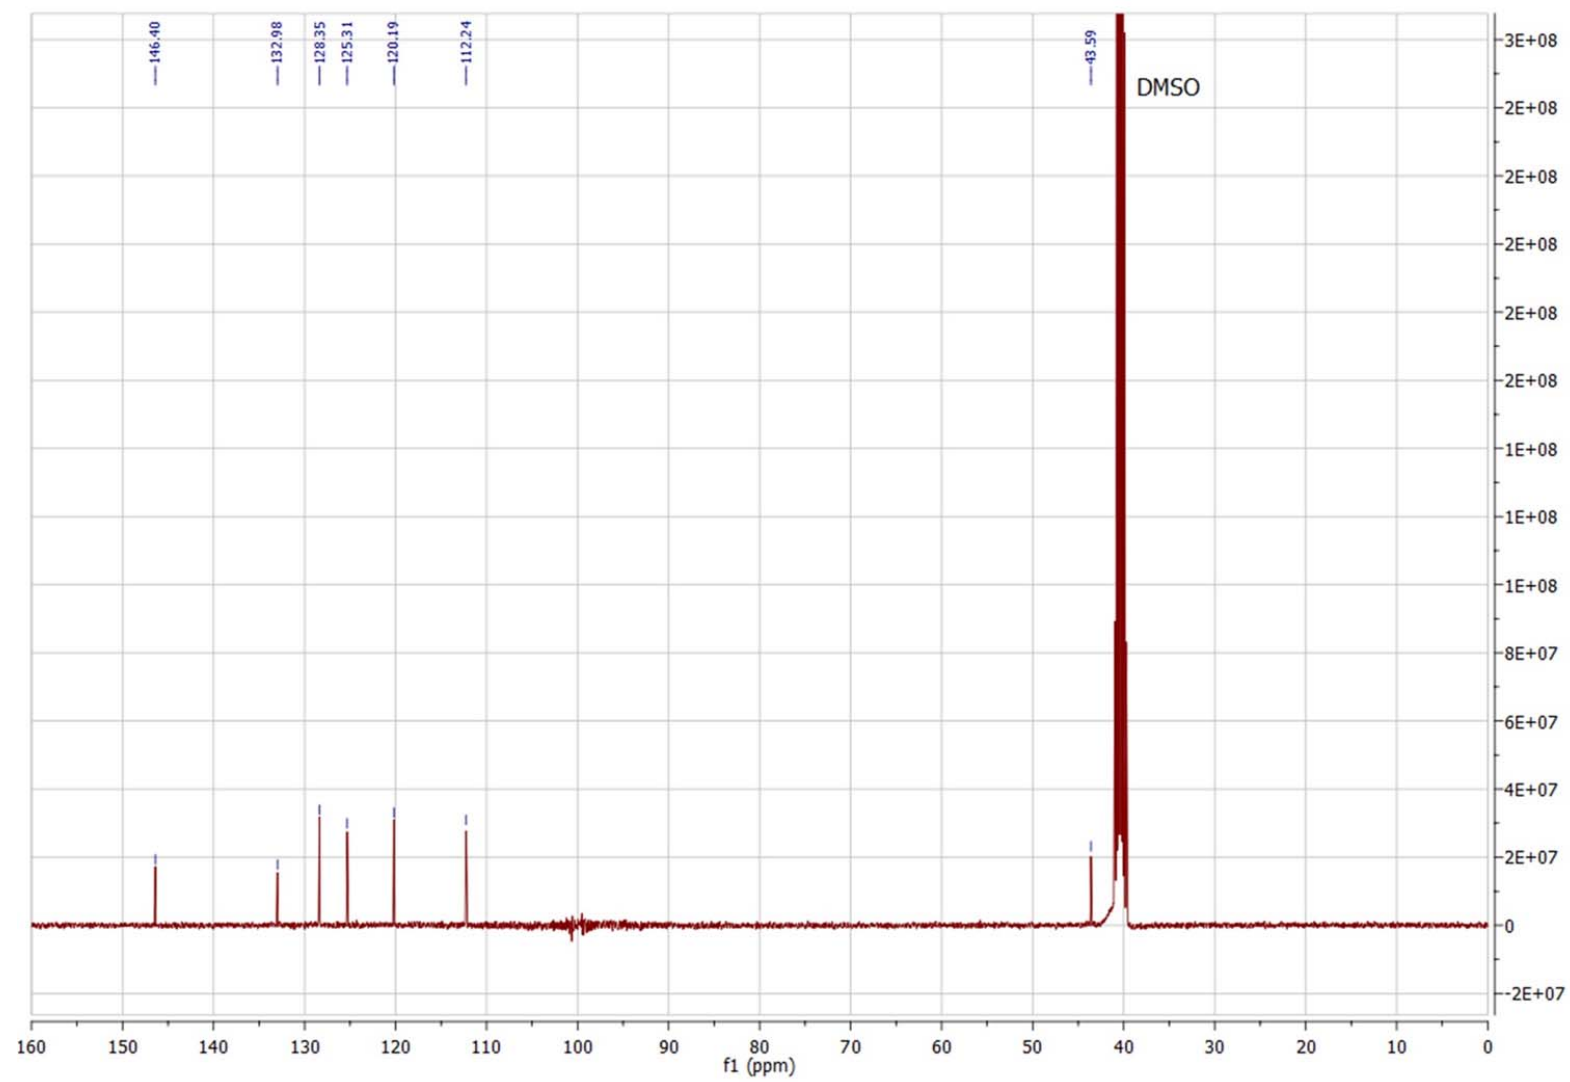

Supplement: AAC.02529-15_zac007165263so1.pdf [file AAC.02529-15_zac007165263so1.pdf]
